1 **Viral infectivity in pediatric SARS-CoV-2 clinical samples does not vary by age**

2 Madaline M. Schmidt<sup>1</sup>, Hannah W. Despres<sup>1</sup>, David J. Shirley<sup>2</sup>, Michael E. Bose<sup>3</sup>, Kate C.  
3 McCaul<sup>3</sup>, Jessica W. Crothers<sup>4</sup>, Kelly J. Henrickson<sup>3</sup>, Benjamin Lee<sup>5</sup>, Emily A. Bruce<sup>1,\*</sup>

4  
5 **Affiliations:**

6 <sup>1</sup>Department of Microbiology and Molecular Genetics, Robert Larner, M.D. College of

7 Medicine, University of Vermont, Burlington VT, 05405, USA.

8 <sup>2</sup>Faraday, Inc. Data Science Department. Burlington VT, 05405, USA.

9 <sup>3</sup>Department of Pediatrics, Medical College of Wisconsin, Milwaukee WI, 53226, USA.

10

11 <sup>4</sup>Department of Pathology and Laboratory Medicine, Robert Larner, M.D. College of Medicine,

12 University of Vermont, Burlington VT, 05405, USA.

13 <sup>5</sup>Department of Pediatrics, Robert Larner, M.D. College of Medicine, University of Vermont,

14 Burlington VT, 05405, USA.

15 **\*Address correspondence to:** Dr. Emily Bruce, Department of Microbiology and Molecular

16 Genetics, University of Vermont, Burlington VT, 05405, [Emily.bruce@med.uvm.edu]

17 **Short title:** Viral infectivity of pediatric SARS-CoV-2 samples

18 **Conflict of Interest Disclosures:** The authors have no conflicts to disclose.

19 **Funding/Support:** This study was supported by NIH grant P30GM118228-04 (to E.A.B.,

20 J.W.C. and B.L.)

21 **Role of Funder:** The NIH had no role in the design and conduct of the study.

22 **Abbreviations:** SARS-CoV-2 (severe acute respiratory syndrome coronavirus 2), COVID-19

23 (coronavirus disease 2019), C<sub>T</sub> (cycle threshold), RT-qPCR (reverse transcription-quantitative

24 polymerase chain reaction), RNA (ribonucleic acid), TMPRSS2 (transmembrane protease, serine

25 2), FFU (focus forming unit)

26

## 27 **Contributors Statement Page**

28 Madaline Schmidt collected data, carried out the initial analyses, drafted the initial manuscript  
29 and critically reviewed and revised the manuscript.

30

31 Hannah Despres collected data and critically reviewed and revised the manuscript.

32

33 David Shirley carried out data analysis and presentation, and critically reviewed and revised the  
34 manuscript.

35

36 Michael Bose and Kate McCaul coordinated sample collection and acquisition, and critically  
37 reviewed and revised the manuscript.

38

39 Dr Jessica Crothers conceptualized and designed the study and critically reviewed and revised  
40 the manuscript.

41

42 Dr Kelly Henrickson conceptualized and designed the study, coordinated sample collection and  
43 IRB permission (MCW), and critically reviewed and revised the manuscript.

44

45 Dr Benjamin Lee conceptualized and designed the study, coordinated sample acquisition and  
46 IRB permission (UVM), and critically reviewed and revised the manuscript.

47

48 Dr Emily Bruce conceptualized and designed the study, coordinated and supervised data  
49 collection, drafted the initial manuscript and critically reviewed and revised the manuscript.

50

51 All authors approved the final manuscript as submitted and agree to be accountable for all  
52 aspects of the work.

53

54

55

56

57

58

59

60

61

62

63 INTRODUCTION

64 During the early months of the SARS-CoV-2 pandemic, notable uncertainty emerged regarding  
65 the role of children in transmission dynamics <sup>1</sup>. With time, it became more clear that children  
66 were susceptible to infection with SARS-CoV-2, but that the vast majority of children  
67 experienced mild symptoms with lower incidence of severe disease <sup>2</sup>. This pattern remained  
68 consistent despite the later emergence of SARS-CoV-2 variants, including Delta and Omicron,  
69 even among children <5 ineligible for vaccination<sup>3</sup>. The relative lack of severe disease in the  
70 pediatric population raised questions regarding viral kinetics and infectivity in children versus  
71 adults.

72 We hypothesized that unique virologic features in children could explain this apparent  
73 decrease in symptoms and transmissibility early in the pandemic. Due to the challenges posed by  
74 measurement of infectious viral titers, the majority of work examining viral loads in clinical  
75 samples has measured viral RNA levels, as determined by RT-qPCR cycle threshold [ $C_T$ ]. A  
76 previous study using this technique reported no differences in viral RNA load in adults and  
77 children, when controlling for the presence of symptoms <sup>4</sup>. A different study reported both RNA  
78 viral load and level of infectious virus using a semi-quantitative method (TCID<sub>50</sub>) in pediatric  
79 clinical samples <sup>5</sup>. In contrast however, other work indicates that ancestral SARS-CoV-2  
80 replicates less efficiently in both children and pediatric versus adult nasal epithelial cells, a  
81 defect that Omicron was able to abolish <sup>5-7</sup>. Finally, we and others have demonstrated a dynamic  
82 relationship between  $C_T$  values and infectious viral titers with potential for significant  
83 discrepancies and a ratio dependent on both viral and host factors, <sup>8</sup> but this work did not include  
84 children <sup>9</sup>.

85           Therefore, to further understand SARS-CoV-2 infection in children, we investigated the  
86 ratio of infectious virus titer to RNA viral load in children aged 0 to <18 years old. We  
87 hypothesized that the ratio of infectious virus to RNA viral load would be positively associated  
88 with age.

89

## 90   METHODS

### 91   **Sample Selection**

92 Banked SARS-CoV-2 positive nasopharyngeal specimens from children 0 to <18 years old  
93 collected and stored at Children’s Wisconsin, Milwaukee, Wisconsin between September 14,  
94 2020 and May 17, 2021 were identified. Deidentified samples were binned into four age groups  
95 (<1, 1-5, 6-11, and 12-17) and stratified by clinical C<sub>T</sub> value (<20, 20-24, 25-29, and 30-34) to  
96 select a sample of children representing the full spectrum of both age and C<sub>T</sub> value . The study  
97 received an exempt determination for use of deidentified specimens from the University of  
98 Vermont (UVM) Institutional Review Board and the Children’s Wisconsin Institutional Review  
99 Board.

100

### 101   **RNA extractions and RT-PCR**

102 Total nucleic acid was extracted on the NucliSENS easyMAG or EMAG automated extraction  
103 instruments (bioMerieux). SARS-CoV-2 RNA was detected using previously published  
104 primers/probes for the SARS-CoV-2 E gene (Sarbeco<sup>10</sup>) on the 7500 Fast Real-Time PCR  
105 System or QuantStudio 7 Pro platforms.

106

### 107   **Viral Titrations**

108 SARS-CoV-2 viral titering was conducted under BSL-3 conditions at UVM using a microfocus  
109 forming unit (FFU) assay in VeroE6-TMPRSS2 cells, which increases assay sensitivity  
110 compared to standard VeroE6 cells, as previously described <sup>8</sup>.

111

## 112 **Statistical Analysis**

113 Viral titers were log-transformed for analysis. Linear regression was used to predict log titer as a  
114 function of  $C_T$ , fitting separate models without age and to control for continuous and categorical  
115 age effects. Models were compared by F test. Data were analyzed and plotted with R. Code is  
116 available at <https://github.com/emilybrucelab>.

117

## 118 **RESULTS**

119 N=144 clinical specimens were selected to determine the relationship between the  
120 infectivity of SARS-CoV-2 in pediatric samples and RNA viral load. As expected, higher RNA  
121 viral load generally correlated with higher infectious virus titer, although as reported previously  
122 this ratio was somewhat variable <sup>8,9</sup>. In linear regression, the relationship between infectious viral  
123 titer and  $C_T$  was not significantly modified by age ( $P=0.156$ ) or age group ( $P=0.355$  overall by F  
124 test). These data indicate that there is no difference in the infectiousness of SARS-CoV-2  
125 produced by children, regardless of age.

126

## 127 **DISCUSSION**

128 Consistent with previous findings, we found no significant differences in the relationship  
129 between SARS-CoV-2 infectious virus titer and RNA viral load in children across the pediatric  
130 age spectrum <sup>4,7</sup>. Our findings suggest equal levels of viral infectivity in children and in adults

131 with similar RNA viral loads. Limitations of this study include lack of access to viral  
132 sequencing and individual level metadata, which could reveal differences in infectivity as a result  
133 of viral genetic background, days post-symptom onset, host immune status, and vaccination  
134 status. Furthermore, there was no direct comparison with adult samples, although we did include  
135 samples in older teens who would closely resemble adults biologically.

136

## 137 ACKNOWLEDGEMENTS

138 We thank Ms. Kubinski and Dr. Oetjen for technical assistance.

139

## 140 REFERENCES

- 141 1. Lee B, Raszka WV, Jr. COVID-19 Transmission and Children: The Child Is Not to  
142 Blame. *Pediatrics*. 2020;146(2).
- 143 2. Lu X, Zhang L, Du H, et al. SARS-CoV-2 Infection in Children. *New England Journal of*  
144 *Medicine*. 2020;382(17):1663-1665.
- 145 3. Wang L, Berger NA, Kaelber DC, Davis PB, Volkow ND, Xu R. Incidence Rates and  
146 Clinical Outcomes of SARS-CoV-2 Infection With the Omicron and Delta Variants in  
147 Children Younger Than 5 Years in the US. *JAMA Pediatrics*. 2022;176(8):811-813.
- 148 4. Chung E, Chow EJ, Wilcox NC, et al. Comparison of Symptoms and RNA Levels in  
149 Children and Adults With SARS-CoV-2 Infection in the Community Setting. *JAMA*  
150 *Pediatrics*. 2021;175(10):e212025-e212025.
- 151 5. Yonker LM, Boucau J, Regan J, et al. Virologic Features of Severe Acute Respiratory  
152 Syndrome Coronavirus 2 Infection in Children. *J Infect Dis*. 2021;224(11):1821-1829.
- 153 6. Jones TC, Biele G, Mühlemann B, et al. Estimating infectiousness throughout SARS-  
154 CoV-2 infection course. *Science*. 2021;373(6551).
- 155 7. Zhu Y, Chew KY, Wu M, et al. Ancestral SARS-CoV-2, but not Omicron, replicates less  
156 efficiently in primary pediatric nasal epithelial cells. *PLOS Biology*.  
157 2022;20(8):e3001728.
- 158 8. Despres HW, Mills MG, Shirley DJ, et al. Measuring infectious SARS-CoV-2 in clinical  
159 samples reveals a higher viral titer:RNA ratio for Delta and Epsilon vs. Alpha variants.  
160 *Proc Natl Acad Sci U S A*. 2022;119(5).
- 161 9. Puhach O, Adea K, Hulo N, et al. Infectious viral load in unvaccinated and vaccinated  
162 patients infected with SARS-CoV-2 WT, Delta and Omicron. *medRxiv*.  
163 2022:2022.2001.2010.22269010.
- 164 10. Corman VM, Landt O, Kaiser M, et al. Detection of 2019 novel coronavirus (2019-  
165 nCoV) by real-time RT-PCR. *Euro Surveill*. 2020;25 (3).

166

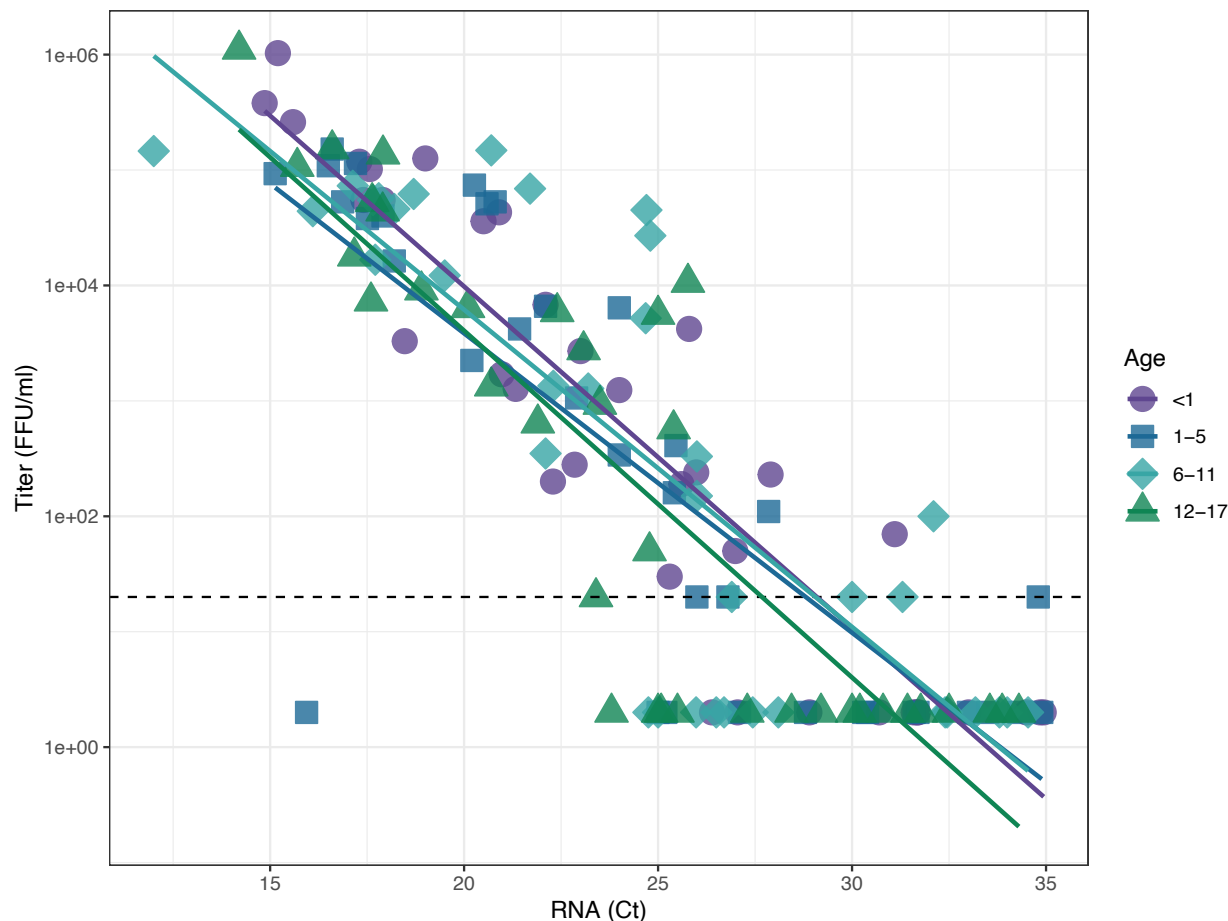

167

168 **Figure 1. SARS-CoV-2 viral infectivity does not vary by age in a pediatric population.**

169 A set of 144 clinical samples from children infected with SARS-CoV-2 was used to examine the  
170 relationship between infectious virus titer and RNA viral load as a function of patient age.

171 Individual specimen measurements of E gene RNA levels ( $C_T$ ) on the x-axis are plotted against  
172 viral titer, as measured in focus forming units (FFU/mL) on the y-axis. Dashed line indicates the  
173 limit of detection for infectious titer (20 FFU/mL). Samples for which we could not measure a  
174 viral titer were assigned fixed values of one-tenth the limit of detection (2 FFU/mL). Lines of  
175 best fit were generated by linear regression on log-transformed titer data as a function of  $C_T$  and  
176 age group.

177

178

179

180

181

182
